# Supplementary material for: Mapping the tuberculosis scientific landscape among BRICS countries: a bibliometric and network analysis
Source: PubMed Central journal article supplement (PMC7066990; doi:10.1590/0074-02760190342), 2020-03-16
Supplement: 1678-8060-mioc-115-e190342-s.pdf [file 1678-8060-mioc-115-e190342-s.pdf]

## TOP 50 organisations - Degree centrality

| Organisation                                        | Degree centrality |
|-----------------------------------------------------|-------------------|
| Univ_Cape_Town_South_Africa                         | 1216              |
| Stellenbosch_Univ_South_Africa                      | 992               |
| Univ_London_Imperial_Coll_Sci_Technol_&_Med_England | 811               |
| Johns_Hopkins_Univ_USA                              | 730               |
| Harvard_Univ_USA                                    | 696               |
| UCL_England                                         | 692               |
| China_CDC_China                                     | 685               |
| UNIV_CALIF_SAN_FRANCISCO_SAN_FRANCISCO_CA_USA       | 642               |
| Fiocruz_Brazil                                      | 621               |
| S_African_Med_Res_Council_South_Africa              | 615               |
| NIH: NIAID_USA                                      | 609               |
| Univ_KwaZulu_Natal_South_Africa                     | 603               |
| AIIMS_India                                         | 581               |
| USP_Brazil                                          | 522               |
| Fudan_Univ_China                                    | 513               |
| WHO_Switzerland                                     | 504               |
| Univ_Witwatersrand_South_Africa                     | 501               |
| Univ_Sydney_NSW_Australia                           | 476               |
| Albert_Einstein_Coll_Med_Bronx_NY_USA               | 461               |
| Karolinska_Inst_Stockholm_Sweden                    | 445               |
| Makerere_Univ_Kampala_Uganda                        | 441               |
| Natl_Inst_Res_TB_India                              | 432               |
| Int_Union_TB_&_Lung_Dis_France                      | 430               |
| Univ_Melbourne_Vic_Australia                        | 420               |
| Univ_Oxford_Oxford_England                          | 417               |
| McGill_Univ_Canada                                  | 415               |
| Univ_Washington_Seattle_WA_USA                      | 408               |
| Minist_Hlth_Riyadh_Saudi_Arabia                     | 399               |
| Yale_Univ_New_Haven_CT_USA                          | 397               |
| London_Sch_Hyg_&_Trop_Med_England                   | 388               |
| Univ_N_Carolina_Chapel_Hill_NC_USA                  | 387               |
| Shandong_Univ_China                                 | 385               |
| Russian_Acad_Sci_Russia                             | 383               |
| Univ_Groningen_Groningen_Netherlands                | 382               |
| Univ_Amsterdam_Netherlands                          | 381               |
| Stanford_Univ_Stanford_CA_USA                       | 377               |
| Norwegian_Inst_Publ_Hlth_Oslo_Norway                | 376               |
| Univ_Bergen_Bergen_Norway                           | 373               |
| Columbia_Univ_New_York_NY_USA                       | 370               |
| EMORY_UNIV_ATLANTA_GA_USA                           | 369               |
| Univ_Massachusetts_Worcester_MA_USA                 | 367               |
| Monash_Univ_Vic_Australia                           | 363               |
| UFRJ_Brazil                                         | 361               |
| Natl_TB_Inst_Karnataka_India                        | 361               |
| Post_Grad_Inst_Med_Educ_&_Res_PGIMER_India          | 358               |
| Chinese_Acad_Med_Sci_China                          | 358               |
| Univ_Minho_Braga_Portugal                           | 358               |
| CDC_USA                                             | 356               |
| Christian_Med_Coll_&_Hosp_India                     | 356               |
| Univ_London_London_England                          | 356               |

Top 30 countries - Degree centrality

| Country      | Degree centrality |
|--------------|-------------------|
| India        | 130               |
| Canada       | 129               |
| South_Africa | 124               |
| USA          | 122               |
| Brazil       | 121               |
| Italy        | 118               |
| France       | 116               |
| Australia    | 116               |
| Philippines  | 114               |
| Spain        | 113               |
| Netherlands  | 113               |
| Indonesia    | 112               |
| UK           | 109               |
| China        | 108               |
| Cameroon     | 107               |
| ETHIOPIA     | 106               |
| Portugal     | 105               |
| Russia       | 105               |
| Japan        | 105               |
| Saudi_Arabia | 105               |
| Denmark      | 104               |
| South_Korea  | 103               |
| UGANDA       | 99                |
| Argentina    | 99                |
| Vietnam      | 98                |
| Mexico       | 98                |
| Pakistan     | 95                |
| Tanzania     | 94                |
| Uruguay      | 93                |
| Slovakia     | 92                |

Top 20 research areas - Degree centrality

| ResearchAreas                                | Degree centrality |
|----------------------------------------------|-------------------|
| Pharmacology_&_Pharmacy                      | 32                |
| Immunology                                   | 29                |
| Biochemistry_&_Molecular_Biology             | 29                |
| Chemistry                                    | 26                |
| Pediatrics                                   | 24                |
| Pathology                                    | 24                |
| Research_&_Experimental_Medicine             | 21                |
| Biotechnology_&_Applied_Microbiology         | 21                |
| Surgery                                      | 20                |
| Radiology_Nuclear_Medicine_&_Medical_Imaging | 20                |
| Computer_Science                             | 20                |
| Biophysics                                   | 19                |
| Cell_Biology                                 | 19                |
| Infectious_Diseases                          | 18                |
| Engineering                                  | 18                |
| Science_&_Technology_-_Other_Topics          | 17                |
| Oncology                                     | 17                |
| Respiratory_System                           | 16                |
| Neurosciences_&_Neurology                    | 16                |
| Microbiology                                 | 15                |
